# Supplementary figures and images for: Effects of Yeast Product Addition and Fermentation Temperature on Lipid Composition, Taste and Mouthfeel Characteristics of Pinot Noir Wine
Source: MDPI journal article supplement (doi:10.3390/horticulturae8010052), 2022-01-06

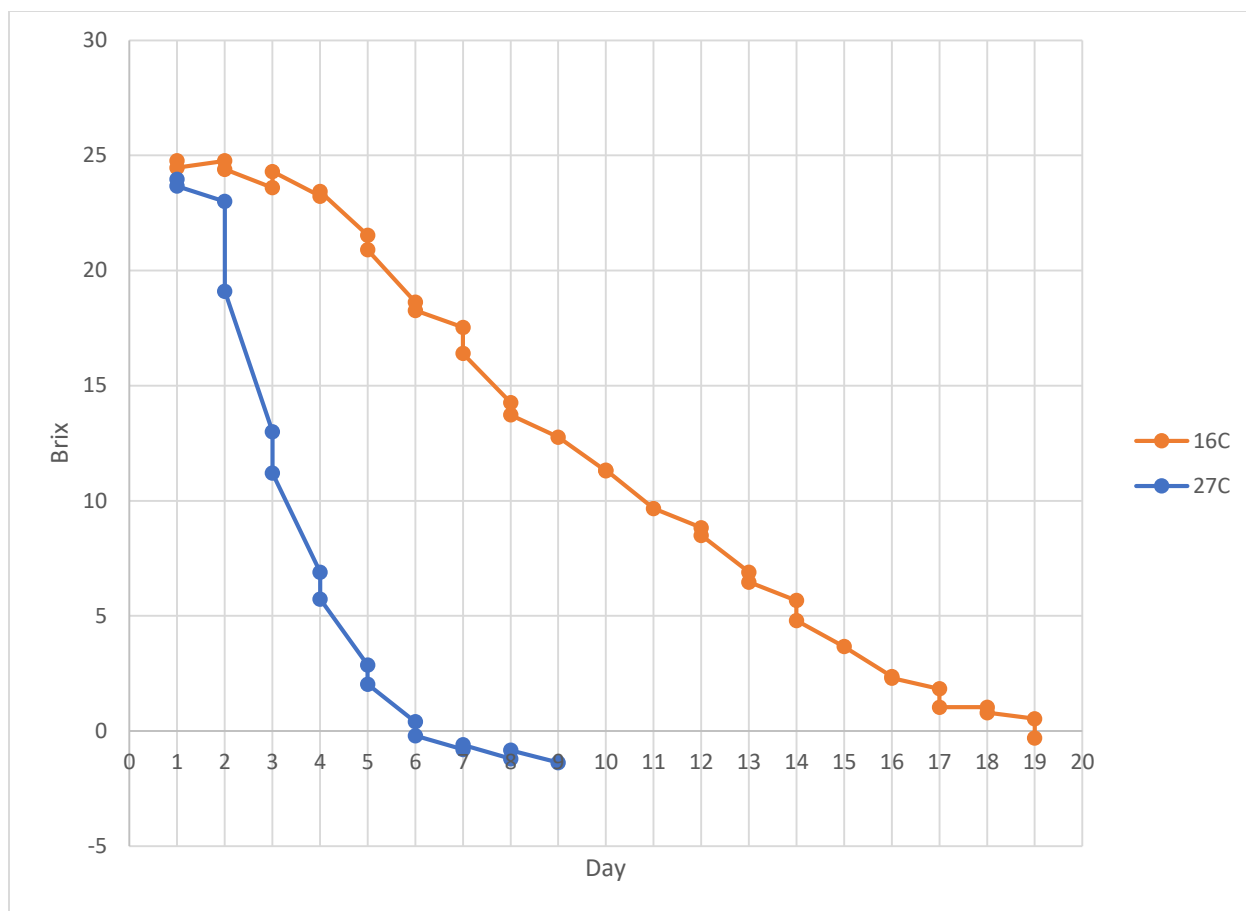

**Figure S1.** Fermentation monitoring as graph of Brix overtime

Supplement: s1 [file s1]
